# Supplementary material for: Transcriptome response of roots to salt stress in a salinity-tolerant bread wheat cultivar
Source: PLoS One. 2019 Mar 15;14(3):e0213305. doi: 10.1371/journal.pone.0213305 (PMC6420002; doi:10.1371/journal.pone.0213305)
Supplement: S4 Table — (XLSX) [file pone.0213305.s013.xlsx]

## Sheet: Molecular function.novel
RNA-Seq analysis of Bread Wheat Root Transcriptome in Response to Salt Stress Functional and Integrative Genomics N. Amirbakhtiar1, A. Ismaili1*, M.R. Ghaffari2, F. Nazarian Firouzabadi1, Z.S. Shobbar2* 1- Department of Agronomy and Plant Breeding, Faculty of Agriculture, Lorestan University, PO Box 465, Khorramabad, Iran. 2- Department of Systems Biology, Agricultural Biotechnology Research Inst…
Molecular function terms assigned to novel transcripts
Level	GO ID	GO Name	Parents (ACC)	Parents (Name)	Nodescore	#Seqs	Sequence Names
1	GO:0003674	molecular_function			492.31	221	TCONS_00194631, TCONS_00195600, TCONS_00194632, TCONS_00205731, TCONS_00060696, TCONS_00060695, TCONS_00060698, TCONS_00060697, TCONS_00095438, TCONS_00019683, TCONS_00148174, TCONS_00222870, TCONS_00047247, TCONS_00210093, TCONS_00211500, TCONS_00212034, TCONS_00065594, TCONS_00101416, TCONS_00131728, TCONS_00175788, TCONS_00143279, TCONS_00008445, TCONS_00018247, TCONS_00008447, TCONS_00008446,…
2	GO:0005488	binding	GO:0003674	molecular_function	463.83	151	TCONS_00194631, TCONS_00195600, TCONS_00194632, TCONS_00205731, TCONS_00060696, TCONS_00060695, TCONS_00060698, TCONS_00060697, TCONS_00095438, TCONS_00016692, TCONS_00106381, TCONS_00019683, TCONS_00148174, TCONS_00110522, TCONS_00022346, TCONS_00210093, TCONS_00211500, TCONS_00136111, TCONS_00144408, TCONS_00144409, TCONS_00212034, TCONS_00009360, TCONS_00131728, TCONS_00143279, TCONS_00008445,…
2	GO:0003824	catalytic activity	GO:0003674	molecular_function	314.07	158	TCONS_00195600, TCONS_00194631, TCONS_00205731, TCONS_00082084, TCONS_00082083, TCONS_00095438, TCONS_00016692, TCONS_00222870, TCONS_00189441, TCONS_00110522, TCONS_00161425, TCONS_00136111, TCONS_00144408, TCONS_00144409, TCONS_00212034, TCONS_00065594, TCONS_00101416, TCONS_00229794, TCONS_00131728, TCONS_00175788, TCONS_00018247, TCONS_00110097, TCONS_00110098, TCONS_00131725, TCONS_00204195,…
2	GO:0005215	transporter activity	GO:0003674	molecular_function	30.13	26	TCONS_00145088, TCONS_00145084, TCONS_00095438, TCONS_00145086, TCONS_00145087, TCONS_00110522, TCONS_00131166, TCONS_00159434, TCONS_00083526, TCONS_00159435, TCONS_00083525, TCONS_00134174, TCONS_00134175, TCONS_00198500, TCONS_00131728, TCONS_00131725, TCONS_00131726, TCONS_00131727, TCONS_00172859, TCONS_00131723, TCONS_00224939, TCONS_00189728, TCONS_00055924, TCONS_00189727, TCONS_00211136,…
3	GO:0097159	organic cyclic compound binding	GO:0005488	binding	203.36	99	TCONS_00195600, TCONS_00194631, TCONS_00205731, TCONS_00194632, TCONS_00060696, TCONS_00060695, TCONS_00060698, TCONS_00060697, TCONS_00095438, TCONS_00016692, TCONS_00106381, TCONS_00019683, TCONS_00148174, TCONS_00110522, TCONS_00211500, TCONS_00144408, TCONS_00144409, TCONS_00212034, TCONS_00131728, TCONS_00143279, TCONS_00008445, TCONS_00110097, TCONS_00008447, TCONS_00110098, TCONS_00008446,…
3	GO:0043167	ion binding	GO:0005488	binding	176.4	105	TCONS_00194631, TCONS_00195600, TCONS_00194632, TCONS_00095438, TCONS_00016692, TCONS_00148174, TCONS_00110522, TCONS_00211500, TCONS_00136111, TCONS_00144408, TCONS_00144409, TCONS_00212034, TCONS_00009360, TCONS_00131728, TCONS_00131725, TCONS_00204195, TCONS_00088919, TCONS_00131726, TCONS_00131727, TCONS_00138646, TCONS_00131723, TCONS_00224939, TCONS_00136345, TCONS_00105863, TCONS_00088884,…
3	GO:0036094	small molecule binding	GO:0005488	binding	87.6	69	TCONS_00195600, TCONS_00031493, TCONS_00060696, TCONS_00060695, TCONS_00060698, TCONS_00060697, TCONS_00095438, TCONS_00016692, TCONS_00019683, TCONS_00148174, TCONS_00194839, TCONS_00110522, TCONS_00159434, TCONS_00083526, TCONS_00159435, TCONS_00083525, TCONS_00211500, TCONS_00144408, TCONS_00144409, TCONS_00102826, TCONS_00041746, TCONS_00131728, TCONS_00102828, TCONS_00102827, TCONS_00110097,…
3	GO:0016740	transferase activity	GO:0003824	catalytic activity	115.2	71	TCONS_00195600, TCONS_00098909, TCONS_00194839, TCONS_00189441, TCONS_00110522, TCONS_00144408, TCONS_00144409, TCONS_00054806, TCONS_00196341, TCONS_00065594, TCONS_00102826, TCONS_00101416, TCONS_00229794, TCONS_00106509, TCONS_00175788, TCONS_00102828, TCONS_00102827, TCONS_00110097, TCONS_00204195, TCONS_00110098, TCONS_00225439, TCONS_00111222, TCONS_00138646, TCONS_00098910, TCONS_00037581,…
3	GO:0016491	oxidoreductase activity	GO:0003824	catalytic activity	50.79	29	TCONS_00145840, TCONS_00231303, TCONS_00205439, TCONS_00082083, TCONS_00130427, TCONS_00159808, TCONS_00130428, TCONS_00016692, TCONS_00138514, TCONS_00222870, TCONS_00042093, TCONS_00042092, TCONS_00216833, TCONS_00035706, TCONS_00212034, TCONS_00019717, TCONS_00196867, TCONS_00114373, TCONS_00063916, TCONS_00138646, TCONS_00207840, TCONS_00108037, TCONS_00109741, TCONS_00108038, TCONS_00068092,…
3	GO:1901363	heterocyclic compound binding	GO:0005488	binding	203.36	99	TCONS_00195600, TCONS_00194631, TCONS_00205731, TCONS_00194632, TCONS_00060696, TCONS_00060695, TCONS_00060698, TCONS_00060697, TCONS_00095438, TCONS_00016692, TCONS_00106381, TCONS_00019683, TCONS_00148174, TCONS_00110522, TCONS_00211500, TCONS_00144408, TCONS_00144409, TCONS_00212034, TCONS_00131728, TCONS_00143279, TCONS_00008445, TCONS_00110097, TCONS_00008447, TCONS_00110098, TCONS_00008446,…
3	GO:0016787	hydrolase activity	GO:0003824	catalytic activity	85.15	56	TCONS_00195600, TCONS_00205731, TCONS_00119258, TCONS_00119259, TCONS_00095438, TCONS_00115218, TCONS_00189441, TCONS_00161425, TCONS_00159434, TCONS_00083526, TCONS_00159435, TCONS_00083525, TCONS_00196341, TCONS_00131728, TCONS_00018247, TCONS_00131725, TCONS_00131726, TCONS_00131727, TCONS_00205483, TCONS_00131723, TCONS_00224939, TCONS_00054930, TCONS_00136345, TCONS_00118290, TCONS_00231220,…
3	GO:0022857	transmembrane transporter activity	GO:0005215	transporter activity	5.68	23	TCONS_00131728, TCONS_00145088, TCONS_00145084, TCONS_00095438, TCONS_00131725, TCONS_00131726, TCONS_00145086, TCONS_00131727, TCONS_00145087, TCONS_00172859, TCONS_00110522, TCONS_00131723, TCONS_00224939, TCONS_00189728, TCONS_00055924, TCONS_00189727, TCONS_00159434, TCONS_00083526, TCONS_00159435, TCONS_00083525, TCONS_00211136, TCONS_00198500, TCONS_00176166
3	GO:0097367	carbohydrate derivative binding	GO:0005488	binding	50.62	56	TCONS_00195600, TCONS_00095438, TCONS_00148174, TCONS_00194839, TCONS_00110522, TCONS_00159434, TCONS_00083526, TCONS_00159435, TCONS_00083525, TCONS_00211500, TCONS_00144408, TCONS_00144409, TCONS_00102826, TCONS_00131728, TCONS_00102828, TCONS_00102827, TCONS_00131725, TCONS_00204195, TCONS_00131726, TCONS_00131727, TCONS_00138646, TCONS_00037581, TCONS_00042958, TCONS_00037582, TCONS_00131723,…
4	GO:1901265	nucleoside phosphate binding	GO:0097159, GO:1901363	organic cyclic compound binding, heterocyclic compound binding	64.98	67	TCONS_00195600, TCONS_00060696, TCONS_00060695, TCONS_00060698, TCONS_00060697, TCONS_00095438, TCONS_00016692, TCONS_00019683, TCONS_00148174, TCONS_00194839, TCONS_00110522, TCONS_00159434, TCONS_00083526, TCONS_00159435, TCONS_00083525, TCONS_00211500, TCONS_00144408, TCONS_00144409, TCONS_00102826, TCONS_00041746, TCONS_00131728, TCONS_00102828, TCONS_00102827, TCONS_00110097, TCONS_00131725,…
4	GO:0016817	hydrolase activity, acting on acid anhydrides	GO:0016787	hydrolase activity	6.28	22	TCONS_00150329, TCONS_00131728, TCONS_00145088, TCONS_00145084, TCONS_00095438, TCONS_00131725, TCONS_00131726, TCONS_00145086, TCONS_00131727, TCONS_00145087, TCONS_00053351, TCONS_00131723, TCONS_00207840, TCONS_00224939, TCONS_00161425, TCONS_00118818, TCONS_00159434, TCONS_00083526, TCONS_00159435, TCONS_00083525, TCONS_00083664, TCONS_00017917
4	GO:0043168	anion binding	GO:0043167	ion binding	80.88	57	TCONS_00195600, TCONS_00031493, TCONS_00095438, TCONS_00148174, TCONS_00194839, TCONS_00110522, TCONS_00159434, TCONS_00083526, TCONS_00159435, TCONS_00083525, TCONS_00211500, TCONS_00144408, TCONS_00144409, TCONS_00102826, TCONS_00131728, TCONS_00102828, TCONS_00102827, TCONS_00131725, TCONS_00204195, TCONS_00131726, TCONS_00131727, TCONS_00138646, TCONS_00037581, TCONS_00042958, TCONS_00037582,…
4	GO:0043169	cation binding	GO:0043167	ion binding	38.11	52	TCONS_00194631, TCONS_00194632, TCONS_00167178, TCONS_00016692, TCONS_00167175, TCONS_00167174, TCONS_00074897, TCONS_00136111, TCONS_00144408, TCONS_00144409, TCONS_00216833, TCONS_00212034, TCONS_00009360, TCONS_00203106, TCONS_00196867, TCONS_00114373, TCONS_00167180, TCONS_00063916, TCONS_00230607, TCONS_00088919, TCONS_00205880, TCONS_00138646, TCONS_00224939, TCONS_00136345, TCONS_00144959,…
4	GO:0000166	nucleotide binding	GO:1901265, GO:0036094	nucleoside phosphate binding, small molecule binding	87.14	67	TCONS_00195600, TCONS_00060696, TCONS_00060695, TCONS_00060698, TCONS_00060697, TCONS_00095438, TCONS_00016692, TCONS_00019683, TCONS_00148174, TCONS_00194839, TCONS_00110522, TCONS_00159434, TCONS_00083526, TCONS_00159435, TCONS_00083525, TCONS_00211500, TCONS_00144408, TCONS_00144409, TCONS_00102826, TCONS_00041746, TCONS_00131728, TCONS_00102828, TCONS_00102827, TCONS_00110097, TCONS_00131725,…
4	GO:0032553	ribonucleotide binding	GO:0097367, GO:0000166	carbohydrate derivative binding, nucleotide binding	30.96	55	TCONS_00195600, TCONS_00095438, TCONS_00148174, TCONS_00194839, TCONS_00110522, TCONS_00159434, TCONS_00083526, TCONS_00159435, TCONS_00083525, TCONS_00211500, TCONS_00144408, TCONS_00144409, TCONS_00102826, TCONS_00131728, TCONS_00102828, TCONS_00102827, TCONS_00131725, TCONS_00204195, TCONS_00131726, TCONS_00131727, TCONS_00138646, TCONS_00037581, TCONS_00042958, TCONS_00037582, TCONS_00131723,…
4	GO:0003676	nucleic acid binding	GO:0097159, GO:1901363	organic cyclic compound binding, heterocyclic compound binding	48.37	36	TCONS_00205731, TCONS_00194632, TCONS_00060696, TCONS_00060695, TCONS_00167178, TCONS_00060698, TCONS_00060697, TCONS_00106381, TCONS_00019683, TCONS_00167175, TCONS_00167174, TCONS_00048354, TCONS_00177169, TCONS_00144408, TCONS_00040111, TCONS_00173582, TCONS_00144409, TCONS_00031942, TCONS_00048353, TCONS_00210057, TCONS_00210056, TCONS_00150329, TCONS_00203106, TCONS_00143279, TCONS_00008445,…
4	GO:0016772	transferase activity, transferring phosphorus-containing groups	GO:0016740	transferase activity	33.03	36	TCONS_00145840, TCONS_00195600, TCONS_00089018, TCONS_00089019, TCONS_00228836, TCONS_00194839, TCONS_00028863, TCONS_00144408, TCONS_00144409, TCONS_00065594, TCONS_00195039, TCONS_00102826, TCONS_00195599, TCONS_00195598, TCONS_00195597, TCONS_00175788, TCONS_00102828, TCONS_00102827, TCONS_00110097, TCONS_00204195, TCONS_00110098, TCONS_00037581, TCONS_00037582, TCONS_00207840, TCONS_00224939,…
4	GO:0001882	nucleoside binding	GO:0097159, GO:0097367, GO:0036094, GO:1901363	organic cyclic compound binding, carbohydrate derivative binding, small molecule binding, heterocyclic compound binding	65.28	56	TCONS_00195600, TCONS_00095438, TCONS_00148174, TCONS_00194839, TCONS_00110522, TCONS_00159434, TCONS_00083526, TCONS_00159435, TCONS_00083525, TCONS_00211500, TCONS_00144408, TCONS_00144409, TCONS_00102826, TCONS_00131728, TCONS_00102828, TCONS_00102827, TCONS_00131725, TCONS_00204195, TCONS_00131726, TCONS_00131727, TCONS_00138646, TCONS_00037581, TCONS_00042958, TCONS_00037582, TCONS_00131723,…
5	GO:0046872	metal ion binding	GO:0043169	cation binding	63.52	52	TCONS_00194631, TCONS_00194632, TCONS_00167178, TCONS_00016692, TCONS_00167175, TCONS_00167174, TCONS_00074897, TCONS_00136111, TCONS_00144408, TCONS_00144409, TCONS_00216833, TCONS_00212034, TCONS_00009360, TCONS_00203106, TCONS_00196867, TCONS_00114373, TCONS_00063916, TCONS_00167180, TCONS_00230607, TCONS_00088919, TCONS_00205880, TCONS_00138646, TCONS_00224939, TCONS_00136345, TCONS_00144959,…
5	GO:0032549	ribonucleoside binding	GO:0001882	nucleoside binding	108.8	56	TCONS_00195600, TCONS_00095438, TCONS_00148174, TCONS_00194839, TCONS_00110522, TCONS_00159434, TCONS_00083526, TCONS_00159435, TCONS_00083525, TCONS_00211500, TCONS_00144408, TCONS_00144409, TCONS_00102826, TCONS_00131728, TCONS_00102828, TCONS_00102827, TCONS_00131725, TCONS_00204195, TCONS_00131726, TCONS_00131727, TCONS_00138646, TCONS_00037581, TCONS_00042958, TCONS_00037582, TCONS_00131723,…
5	GO:0016818	hydrolase activity, acting on acid anhydrides, in phosphorus-containing anhydrides	GO:0016817	hydrolase activity, acting on acid anhydrides	2.04	22	TCONS_00150329, TCONS_00131728, TCONS_00145088, TCONS_00145084, TCONS_00095438, TCONS_00131725, TCONS_00131726, TCONS_00145086, TCONS_00131727, TCONS_00145087, TCONS_00053351, TCONS_00131723, TCONS_00207840, TCONS_00224939, TCONS_00161425, TCONS_00118818, TCONS_00159434, TCONS_00083526, TCONS_00159435, TCONS_00083525, TCONS_00083664, TCONS_00017917
5	GO:0017076	purine nucleotide binding	GO:0000166	nucleotide binding	30.96	55	TCONS_00195600, TCONS_00095438, TCONS_00148174, TCONS_00194839, TCONS_00110522, TCONS_00159434, TCONS_00083526, TCONS_00159435, TCONS_00083525, TCONS_00211500, TCONS_00144408, TCONS_00144409, TCONS_00102826, TCONS_00131728, TCONS_00102828, TCONS_00102827, TCONS_00131725, TCONS_00204195, TCONS_00131726, TCONS_00131727, TCONS_00138646, TCONS_00037581, TCONS_00042958, TCONS_00037582, TCONS_00131723,…
5	GO:0016773	phosphotransferase activity, alcohol group as acceptor	GO:0016772	transferase activity, transferring phosphorus-containing groups	21.12	25	TCONS_00195600, TCONS_00089018, TCONS_00089019, TCONS_00228836, TCONS_00194839, TCONS_00028863, TCONS_00144408, TCONS_00144409, TCONS_00102826, TCONS_00195599, TCONS_00195598, TCONS_00195597, TCONS_00102828, TCONS_00102827, TCONS_00204195, TCONS_00037581, TCONS_00037582, TCONS_00207840, TCONS_00224939, TCONS_00159449, TCONS_00188933, TCONS_00081511, TCONS_00081510, TCONS_00089017, TCONS_00156392
5	GO:0016301	kinase activity	GO:0016772	transferase activity, transferring phosphorus-containing groups	54.12	33	TCONS_00195600, TCONS_00145840, TCONS_00089018, TCONS_00089019, TCONS_00228836, TCONS_00194839, TCONS_00028863, TCONS_00144408, TCONS_00144409, TCONS_00065594, TCONS_00102826, TCONS_00195039, TCONS_00195599, TCONS_00195598, TCONS_00195597, TCONS_00175788, TCONS_00102828, TCONS_00102827, TCONS_00204195, TCONS_00037581, TCONS_00037582, TCONS_00207840, TCONS_00224939, TCONS_00159449, TCONS_00189728,…
5	GO:0035639	purine ribonucleoside triphosphate binding	GO:1901265, GO:0043168	nucleoside phosphate binding, anion binding	27	45	TCONS_00195600, TCONS_00089018, TCONS_00089019, TCONS_00145088, TCONS_00145084, TCONS_00095438, TCONS_00145086, TCONS_00145087, TCONS_00228836, TCONS_00194839, TCONS_00028863, TCONS_00159434, TCONS_00083526, TCONS_00159435, TCONS_00083525, TCONS_00211500, TCONS_00144408, TCONS_00144409, TCONS_00083664, TCONS_00017917, TCONS_00102826, TCONS_00150329, TCONS_00195599, TCONS_00195598, TCONS_00195597,…
5	GO:0032555	purine ribonucleotide binding	GO:0032553, GO:0017076	ribonucleotide binding, purine nucleotide binding	51.6	55	TCONS_00195600, TCONS_00095438, TCONS_00148174, TCONS_00194839, TCONS_00110522, TCONS_00159434, TCONS_00083526, TCONS_00159435, TCONS_00083525, TCONS_00211500, TCONS_00144408, TCONS_00144409, TCONS_00102826, TCONS_00131728, TCONS_00102828, TCONS_00102827, TCONS_00131725, TCONS_00204195, TCONS_00131726, TCONS_00131727, TCONS_00138646, TCONS_00037581, TCONS_00042958, TCONS_00037582, TCONS_00131723,…
5	GO:0001883	purine nucleoside binding	GO:0001882	nucleoside binding	52.8	55	TCONS_00195600, TCONS_00095438, TCONS_00148174, TCONS_00194839, TCONS_00110522, TCONS_00159434, TCONS_00083526, TCONS_00159435, TCONS_00083525, TCONS_00211500, TCONS_00144408, TCONS_00144409, TCONS_00102826, TCONS_00131728, TCONS_00102828, TCONS_00102827, TCONS_00131725, TCONS_00204195, TCONS_00131726, TCONS_00131727, TCONS_00138646, TCONS_00037581, TCONS_00042958, TCONS_00037582, TCONS_00131723,…
6	GO:0032550	purine ribonucleoside binding	GO:0032549, GO:0001883	ribonucleoside binding, purine nucleoside binding	88	55	TCONS_00195600, TCONS_00095438, TCONS_00148174, TCONS_00194839, TCONS_00110522, TCONS_00159434, TCONS_00083526, TCONS_00159435, TCONS_00083525, TCONS_00211500, TCONS_00144408, TCONS_00144409, TCONS_00102826, TCONS_00131728, TCONS_00102828, TCONS_00102827, TCONS_00131725, TCONS_00204195, TCONS_00131726, TCONS_00131727, TCONS_00138646, TCONS_00037581, TCONS_00042958, TCONS_00037582, TCONS_00131723,…
6	GO:0016462	pyrophosphatase activity	GO:0016818	hydrolase activity, acting on acid anhydrides, in phosphorus-containing anhydrides	3.4	22	TCONS_00150329, TCONS_00131728, TCONS_00145088, TCONS_00145084, TCONS_00095438, TCONS_00131725, TCONS_00131726, TCONS_00145086, TCONS_00131727, TCONS_00145087, TCONS_00053351, TCONS_00131723, TCONS_00207840, TCONS_00224939, TCONS_00161425, TCONS_00118818, TCONS_00159434, TCONS_00083526, TCONS_00159435, TCONS_00083525, TCONS_00083664, TCONS_00017917
6	GO:0004672	protein kinase activity	GO:0016301, GO:0016773	kinase activity, phosphotransferase activity, alcohol group as acceptor	35.2	25	TCONS_00195600, TCONS_00089018, TCONS_00089019, TCONS_00228836, TCONS_00194839, TCONS_00028863, TCONS_00144408, TCONS_00144409, TCONS_00102826, TCONS_00195599, TCONS_00195598, TCONS_00195597, TCONS_00102828, TCONS_00102827, TCONS_00204195, TCONS_00037581, TCONS_00037582, TCONS_00207840, TCONS_00224939, TCONS_00159449, TCONS_00188933, TCONS_00081511, TCONS_00081510, TCONS_00089017, TCONS_00156392
6	GO:0046914	transition metal ion binding	GO:0046872	metal ion binding	16.2	27	TCONS_00194632, TCONS_00167178, TCONS_00205876, TCONS_00205439, TCONS_00130427, TCONS_00130428, TCONS_00167175, TCONS_00167174, TCONS_00125361, TCONS_00125362, TCONS_00136111, TCONS_00144408, TCONS_00144409, TCONS_00216833, TCONS_00174053, TCONS_00212034, TCONS_00172470, TCONS_00180726, TCONS_00203106, TCONS_00063916, TCONS_00230607, TCONS_00009559, TCONS_00138646, TCONS_00207840, TCONS_00136345,…
6	GO:0030554	adenyl nucleotide binding	GO:0017076	purine nucleotide binding	50.88	53	TCONS_00195600, TCONS_00095438, TCONS_00148174, TCONS_00194839, TCONS_00110522, TCONS_00159434, TCONS_00083526, TCONS_00159435, TCONS_00083525, TCONS_00211500, TCONS_00144408, TCONS_00144409, TCONS_00102826, TCONS_00131728, TCONS_00102828, TCONS_00102827, TCONS_00131725, TCONS_00204195, TCONS_00131726, TCONS_00131727, TCONS_00037581, TCONS_00042958, TCONS_00037582, TCONS_00131723, TCONS_00042959,…
6	GO:0032559	adenyl ribonucleotide binding	GO:0032555, GO:0030554	purine ribonucleotide binding, adenyl nucleotide binding	84.8	53	TCONS_00195600, TCONS_00095438, TCONS_00148174, TCONS_00194839, TCONS_00110522, TCONS_00159434, TCONS_00083526, TCONS_00159435, TCONS_00083525, TCONS_00211500, TCONS_00144408, TCONS_00144409, TCONS_00102826, TCONS_00131728, TCONS_00102828, TCONS_00102827, TCONS_00131725, TCONS_00204195, TCONS_00131726, TCONS_00131727, TCONS_00037581, TCONS_00042958, TCONS_00037582, TCONS_00131723, TCONS_00042959,…
6	GO:0005524	ATP binding	GO:0035639, GO:0032559, GO:0032550	purine ribonucleoside triphosphate binding, adenyl ribonucleotide binding, purine ribonucleoside binding	43	43	TCONS_00195600, TCONS_00089018, TCONS_00089019, TCONS_00145088, TCONS_00145084, TCONS_00095438, TCONS_00145086, TCONS_00145087, TCONS_00228836, TCONS_00194839, TCONS_00028863, TCONS_00159434, TCONS_00083526, TCONS_00159435, TCONS_00083525, TCONS_00211500, TCONS_00144408, TCONS_00144409, TCONS_00083664, TCONS_00017917, TCONS_00102826, TCONS_00150329, TCONS_00195599, TCONS_00195598, TCONS_00195597,…
