# Supplementary material for: Transcriptome response of roots to salt stress in a salinity-tolerant bread wheat cultivar
Source: PLoS One. 2019 Mar 15;14(3):e0213305. doi: 10.1371/journal.pone.0213305 (PMC6420002; doi:10.1371/journal.pone.0213305)
Supplement: S12 Table — (XLSX) [file pone.0213305.s021.xlsx]

## Sheet: Novel DEGs
RNA-Seq analysis of Bread Wheat Root Transcriptome in Response to Salt Stress N. Amirbakhtiar, A. Ismaili*, M.R. Ghaffari, F. Nazarian Firouzabadi, Z.S. Shobbar*
List of novel differentially expressed genes
test_id	description
	[Hordeum vulgare vulgare]
TCONS_00115041	[Hordeum vulgare vulgare]
TCONS_00124677	[Hordeum vulgare vulgare]
TCONS_00219877	[Hordeum vulgare vulgare]
TCONS_00231294	[Physcomitrella patens]
TCONS_00171289	11 kDa late embryogenesis abundant -like [Setaria italica]
TCONS_00114373	1-aminocyclopropane-1-carboxylate oxidase-1
TCONS_00075564	acyl- thioesterase 2-like
TCONS_00101269	acyltransferase chloroplastic
TCONS_00175788	armadillo beta-catenin repeat related
TCONS_00231219	atp synthase subunit beta
TCONS_00231307	atp synthase subunit beta
TCONS_00231317	atp synthase subunit beta
TCONS_00224466	BURP domain-containing 11-like isoform X2
TCONS_00186379	BURP domain-containing 13-like [Setaria italica]
TCONS_00186380	BURP domain-containing 13-like [Setaria italica]
TCONS_00144959	cellulose synthase A catalytic subunit 9 [UDP-forming]
TCONS_00016297	Conserved [Lactobacillus rhamnosus GG]
TCONS_00001318	Cortical cell-delineating
TCONS_00159808	cytochrome P450 monooxygenase
TCONS_00173458	dehydrin [Triticum turgidum durum]
TCONS_00144995	dehydrin partial [Hordeum vulgare spontaneum]
TCONS_00189727	Diacylglycerol kinase
TCONS_00198500	drought-induced RDI [Oryza sativa Japonica Group]
TCONS_00193877	FAR1-RELATED SEQUENCE 10 [Brachypodium distachyon]
TCONS_00034180	FAR1-RELATED SEQUENCE 3
TCONS_00205439	Flavonoid 3 -monooxygenase
TCONS_00133207	glucan endo-1,3-beta-glucosidase 8-like
TCONS_00181512	high-affinity nitrate transporter-activating -like [Setaria italica]
TCONS_00199194	hypothetical protein B456_003G156400
TCONS_00113727	hypothetical protein Ccrd_002160
TCONS_00102069	hypothetical protein EUGRSUZ_J02069
TCONS_00104491	hypothetical protein F775_06709
TCONS_00053098	hypothetical protein F775_08562
TCONS_00205410	hypothetical protein F775_13830
TCONS_00048793	hypothetical protein F775_23973
TCONS_00128525	hypothetical protein F775_28873
TCONS_00230801	hypothetical protein GLYMA_13G013900 [Glycine max]
TCONS_00231293	hypothetical protein GLYMA_13G013900 [Glycine max]
TCONS_00231300	hypothetical protein GLYMA_13G013900 [Glycine max]
TCONS_00230482	hypothetical protein GLYMA_13G0180002, partial
TCONS_00231304	hypothetical protein GLYMA_13G021500
TCONS_00202604	hypothetical protein LR48_Vigan03g091700
TCONS_00230084	hypothetical protein M408DRAFT_318969
TCONS_00230144	hypothetical protein M408DRAFT_318969
TCONS_00231315	hypothetical protein MTR_0021s0160 [Medicago truncatula]
TCONS_00019801	hypothetical protein MTR_0986s0010, partial [Medicago truncatula]
TCONS_00222341	hypothetical protein OsI_28776
TCONS_00008387	hypothetical protein OXYTRI_13058
TCONS_00228013	hypothetical protein PHAVU_011G146200g [Phaseolus vulgaris]
TCONS_00202801	hypothetical protein PSTG_19930, partial
TCONS_00180992	hypothetical protein SORBIDRAFT_0016s002240, partial [Sorghum bicolor]
TCONS_00230231	hypothetical protein SORBIDRAFT_0016s002240, partial [Sorghum bicolor]
TCONS_00231089	hypothetical protein SORBIDRAFT_0070s002020, partial [Sorghum bicolor]
TCONS_00231111	hypothetical protein SOVF_183600
TCONS_00001172	hypothetical protein T12_9261, partial
TCONS_00112558	hypothetical protein TRIUR3_02295
TCONS_00040810	hypothetical protein TRIUR3_07214
TCONS_00119499	hypothetical protein TRIUR3_07442
TCONS_00119615	hypothetical protein TRIUR3_07442
TCONS_00194892	hypothetical protein TRIUR3_11227
TCONS_00137364	hypothetical protein TRIUR3_13864
TCONS_00140698	hypothetical protein TRIUR3_15413
TCONS_00132848	hypothetical protein TRIUR3_17864
TCONS_00047460	hypothetical protein TRIUR3_18413
TCONS_00136388	hypothetical protein TRIUR3_25367
TCONS_00070712	hypothetical protein TRIUR3_28377
TCONS_00073390	hypothetical protein TRIUR3_28377
TCONS_00137362	hypothetical protein TRIUR3_29088 [Triticum urartu]
TCONS_00159608	hypothetical protein TRIUR3_29088 [Triticum urartu]
TCONS_00101632	hypothetical protein TRIUR3_33447
TCONS_00199193	hypothetical protein ZEAMMB73_284819
TCONS_00174126	Iron sulfur cluster assembly mitochondrial
TCONS_00036019	Leucoanthocyanidin reductase
TCONS_00185919	LPXTG-motif cell wall anchor domain
TCONS_00008445	MADS-box transcription factor 27
TCONS_00001479	---NA---
TCONS_00003789	---NA---
TCONS_00004937	---NA---
TCONS_00010418	---NA---
TCONS_00012953	---NA---
TCONS_00016573	---NA---
TCONS_00017105	---NA---
TCONS_00018463	---NA---
TCONS_00018549	---NA---
TCONS_00024723	---NA---
TCONS_00025633	---NA---
TCONS_00027315	---NA---
TCONS_00032459	---NA---
TCONS_00032537	---NA---
TCONS_00032765	---NA---
TCONS_00037538	---NA---
TCONS_00048902	---NA---
TCONS_00053408	---NA---
TCONS_00079474	---NA---
TCONS_00096370	---NA---
TCONS_00106252	---NA---
TCONS_00106274	---NA---
TCONS_00110913	---NA---
TCONS_00125109	---NA---
TCONS_00128423	---NA---
TCONS_00131425	---NA---
TCONS_00137991	---NA---
TCONS_00139936	---NA---
TCONS_00141542	---NA---
TCONS_00143923	---NA---
TCONS_00145773	---NA---
TCONS_00146234	---NA---
TCONS_00148093	---NA---
TCONS_00153403	---NA---
TCONS_00153427	---NA---
TCONS_00156393	---NA---
TCONS_00159454	---NA---
TCONS_00160814	---NA---
TCONS_00164805	---NA---
TCONS_00166817	---NA---
TCONS_00174414	---NA---
TCONS_00174418	---NA---
TCONS_00174420	---NA---
TCONS_00174421	---NA---
TCONS_00176589	---NA---
TCONS_00178504	---NA---
TCONS_00181513	---NA---
TCONS_00185452	---NA---
TCONS_00185453	---NA---
TCONS_00187405	---NA---
TCONS_00188211	---NA---
TCONS_00188212	---NA---
TCONS_00189483	---NA---
TCONS_00193764	---NA---
TCONS_00203374	---NA---
TCONS_00206171	---NA---
TCONS_00209476	---NA---
TCONS_00214816	---NA---
TCONS_00221003	---NA---
TCONS_00229593	---NA---
TCONS_00016028	non-specific lipid-transfer AKCS9
TCONS_00138646	Obtusifoliol 14-alpha demethylase
TCONS_00224467	O-methyltransferase ZRP4
TCONS_00088739	Os01g0104400 [Oryza sativa Japonica Group]
TCONS_00096157	Os01g0110200 [Oryza sativa Japonica Group]		Putative extensin-like cell wall protein
TCONS_00083664	Os01g0226400 [Oryza sativa Japonica Group]
TCONS_00095885	Os01g0565600 [Oryza sativa Japonica Group]
TCONS_00069055	Os01g0644200 [Oryza sativa Japonica Group]		Little protein 1
TCONS_00194839	Os01g0960400 [Oryza sativa Japonica Group]		SER/THRE Kinase, Receptor,
TCONS_00018872	Os02g0324300 [Oryza sativa Japonica Group]		Nuclear protein-like
TCONS_00137682	Os03g0416200 [Oryza sativa Japonica Group]		COBRA-like protein 5
TCONS_00137683	Os03g0416200 [Oryza sativa Japonica Group]		COBRA-like protein 6
TCONS_00125551	Os03g0656500 [Oryza sativa Japonica Group]		Na+/Ca2+ Exchanger-like Protein
TCONS_00119258	Os03g0722500 [Oryza sativa Japonica Group]		Glucan endo-1,3-beta-glucosidase 7, putative, expressed
TCONS_00174053	Os04g0402500 [Oryza sativa Japonica Group]
TCONS_00180726	Os04g0402500 [Oryza sativa Japonica Group]
TCONS_00195039	Os04g0402500 [Oryza sativa Japonica Group]
TCONS_00045458	Os04g0410400 [Oryza sativa Japonica Group]
TCONS_00176166	Os04g0480200 [Oryza sativa Japonica Group]		Probable high-affinity nitrate transporter-activating protein 2.2
TCONS_00037581	Os07g0537000 [Oryza sativa Japonica Group]		Serine/threonine kinase receptor-like protein
TCONS_00065594	Os07g0572400 [Oryza sativa Japonica Group]
TCONS_00202891	Os09g0499400 [Oryza sativa Japonica Group]
TCONS_00009559	Os10g0467800 [Oryza sativa Japonica Group]		Cellulose synthase A catalytic subunit 7 [UDP-forming]
TCONS_00223697	Os10g0530600 [Oryza sativa Japonica Group]		Glutathione S-transferase, N-terminal domain containing protein, expressed
TCONS_00023095	Os10g0530900 [Oryza sativa Japonica Group]		Probable glutathione S-transferase GSTU6
TCONS_00180946	partial [Micromonas pusilla CCMP1545]
TCONS_00230128	partial [Micromonas pusilla CCMP1545]
TCONS_00159447	pathogenesis-related 1-7 [Triticum aestivum]
TCONS_00040802	periaxin-like [Brachypodium distachyon]
TCONS_00145840	Periplasmic beta-glucosidase
TCONS_00196867	Peroxidase 70
TCONS_00230607	PHD finger rhinoceros
TCONS_00147906	phosphatase 2C 53
TCONS_00142692	phytochelatin synthetase
TCONS_00165738	predicted protein, partial
TCONS_00181380	predicted protein, partial
TCONS_00230060	PREDICTED: uncharacterized protein LOC103956333
TCONS_00231087	PREDICTED: uncharacterized protein LOC104434852
TCONS_00048353	retrotransposon Ty1-copia subclass
TCONS_00109969	retrotransposon Ty1-copia subclass
TCONS_00144408	retrotransposon Ty1-copia subclass
TCONS_00110097	retrotransposon unclassified
TCONS_00227287	retrotransposon unclassified
TCONS_00060695	RNA-binding rbpE
TCONS_00019798	rRNA intron-encoded homing [Medicago truncatula]
TCONS_00180990	rRNA intron-encoded homing [Medicago truncatula]
TCONS_00231220	rRNA intron-encoded homing [Medicago truncatula]
TCONS_00230426	rrna intron-encoded homing endonuclease
TCONS_00231108	RRNA intron-encoded homing endonuclease
TCONS_00008887	senescence-associated [Medicago truncatula]
TCONS_00008991	senescence-associated [Medicago truncatula]
TCONS_00019768	senescence-associated [Medicago truncatula]
TCONS_00019806	senescence-associated [Medicago truncatula]
TCONS_00162342	senescence-associated [Medicago truncatula]
TCONS_00162348	senescence-associated [Medicago truncatula]
TCONS_00162352	senescence-associated [Medicago truncatula]
TCONS_00180950	senescence-associated [Medicago truncatula]
TCONS_00180966	senescence-associated [Medicago truncatula]
TCONS_00230425	senescence-associated [Medicago truncatula]
TCONS_00230433	senescence-associated [Medicago truncatula]
TCONS_00230494	senescence-associated [Medicago truncatula]
TCONS_00230905	senescence-associated [Medicago truncatula]
TCONS_00231288	senescence-associated [Medicago truncatula]
TCONS_00231301	senescence-associated [Medicago truncatula]
TCONS_00231309	senescence-associated [Medicago truncatula]
TCONS_00231322	senescence-associated [Medicago truncatula]
TCONS_00231323	senescence-associated [Medicago truncatula]
TCONS_00231303	senescence-associated [Micromonas pusilla CCMP1545]
TCONS_00069925	Sulfotransferase 17
TCONS_00231084	T02955probable cytochrome P450 monooxygenase - maize (fragment)
TCONS_00026111	thaumatin domain family [Zea mays]
TCONS_00122123	transmembrane [Medicago truncatula]
TCONS_00162350	transmembrane [Medicago truncatula]
TCONS_00230395	transmembrane [Medicago truncatula]
TCONS_00230507	transmembrane [Medicago truncatula]
TCONS_00230751	transmembrane [Medicago truncatula]
TCONS_00230808	transmembrane [Medicago truncatula]
TCONS_00231113	transmembrane [Medicago truncatula]
TCONS_00231297	transmembrane [Medicago truncatula]
TCONS_00172859	TRANSPARENT TESTA 12
TCONS_00018670	transposon En Spm sub-class
TCONS_00179404	transposon En Spm sub-class
TCONS_00035812	transposon unclassified [Oryza sativa Japonica Group]
TCONS_00169449	Tryptophanyl-tRNA cytoplasmic
TCONS_00156392	Tyrosine aminotransferase
TCONS_00053097	Ubiquitin carboxyl-terminal hydrolase 9
TCONS_00162841	U-box domain-containing 42 [Setaria italica]
TCONS_00019764	unknown
TCONS_00231109	UNKNOWN
TCONS_00093943	unnamed protein product
TCONS_00019821	zinc finger MYM-type 1-like
TCONS_00173582	zinc finger MYM-type 1-like
TCONS_00032011	[Hordeum vulgare vulgare]
TCONS_00044561	[Hordeum vulgare vulgare]
TCONS_00082083	[Hordeum vulgare vulgare]
TCONS_00082084	[Hordeum vulgare vulgare]
TCONS_00105650	[Hordeum vulgare vulgare]
TCONS_00122052	[Hordeum vulgare vulgare]
TCONS_00128582	[Hordeum vulgare vulgare]
TCONS_00199275	[Hordeum vulgare vulgare]
TCONS_00217464	[Hordeum vulgare vulgare]
TCONS_00041013	[Oryza sativa Indica Group]
TCONS_00052190	[Oryza sativa Japonica Group]
TCONS_00055924	[Oryza sativa Japonica Group]
TCONS_00136345	[Theobroma cacao]
TCONS_00138514	2-oxoisovalerate dehydrogenase alpha mitochondrial expressed [Oryza sativa Japonica Group]
TCONS_00109741	3-hydroxybenzoate 6-hydroxylase 1
TCONS_00141714	4-coumarate-- ligase 7
TCONS_00065130	AAA ATPase containing von Willebrand factor type A precursor [Zea mays]
TCONS_00062154	ABC transporter G family member 37
TCONS_00031703	ABC transporter G family member 5
TCONS_00019717	acc oxidase [Zea mays]
TCONS_00028862	AF081024_1hypoxia-induced hypothetical protein 162
TCONS_00217088	agmatine coumaroyltransferase-2-like
TCONS_00042092	Alternative oxidase mitochondrial
TCONS_00042093	Alternative oxidase mitochondrial
TCONS_00040989	amidase [Setaria italica]
TCONS_00053352	AP-3 complex subunit mu-1
TCONS_00205483	Apocytochrome f
TCONS_00196341	avenin-like a precursor
TCONS_00000538	basic 7S globulin-like
TCONS_00105600	BLN1-1 [Hordeum vulgare vulgare]
TCONS_00151950	BLN2 [Hordeum vulgare vulgare]
TCONS_00121981	Blue copper
TCONS_00024418	Bowman-Birk type wound-induced protease inhibitor [Triticum dicoccoides]
TCONS_00136135	BTB POZ and MATH domain-containing 1
TCONS_00082700	BURP domain-containing 3-like
TCONS_00224939	calcium-transporting ATPase plasma membrane-type
TCONS_00211500	cell division AAA ATPase family
TCONS_00106510	Chalcone synthase
TCONS_00049430	circumsporozoite -like
TCONS_00061596	circumsporozoite -like
TCONS_00198269	CLE family 601 [Oryza sativa Japonica Group]
TCONS_00205880	copia-type pol poly
TCONS_00102826	cysteine-rich receptor kinase 10
TCONS_00212034	cytochrome P450 77A3-like
TCONS_00216833	Cytochrome P450 89A2
TCONS_00098909	Cytokinin-O-glucosyltransferase 1
TCONS_00114968	Cytokinin-O-glucosyltransferase 2
TCONS_00053351	DEAD-box ATP-dependent RNA helicase 37
TCONS_00150329	DEAD-box ATP-dependent RNA helicase 37
TCONS_00110522	Diacylglycerol kinase 1
TCONS_00042961	disease resistance RGA3 [Setaria italica]
TCONS_00207840	disease resistance RGA4
TCONS_00042376	Disease resistance RPM1
TCONS_00148159	disease resistance RPP13 2 [Brachypodium distachyon]
TCONS_00215678	Eukaryotic peptide chain release factor subunit 1-2
TCONS_00132895	formate--tetrahydrofolate ligase-like
TCONS_00115235	Fruit bromelain
TCONS_00136111	Germin 8-5
TCONS_00125361	germin 9-3
TCONS_00125362	Germin 9-3
TCONS_00205876	Germin 9-3
TCONS_00054806	glutathione S-transferase
TCONS_00229794	glutathione S-transferase [Zea mays]
TCONS_00118290	glycerol-3-phosphate 2-O-acyltransferase 6-like
TCONS_00031127	glycine rich partial
TCONS_00028863	G-type lectin S-receptor-like serine threonine- kinase At1g34300
TCONS_00047247	harpin inducing [Zea mays]
TCONS_00161425	helicase [Oryza sativa Japonica Group]
TCONS_00127322	hypothetical protein F775_00502
TCONS_00051736	hypothetical protein F775_00909
TCONS_00188935	hypothetical protein F775_01524
TCONS_00056040	hypothetical protein F775_02279
TCONS_00067099	hypothetical protein F775_04345
TCONS_00086277	hypothetical protein F775_04345
TCONS_00009022	hypothetical protein F775_07708
TCONS_00025723	hypothetical protein F775_07708
TCONS_00151946	hypothetical protein F775_07716
TCONS_00093996	hypothetical protein F775_09642
TCONS_00025725	hypothetical protein F775_16189
TCONS_00001001	hypothetical protein F775_16191
TCONS_00023784	hypothetical protein F775_20656
TCONS_00153052	hypothetical protein F775_21051
TCONS_00032666	hypothetical protein F775_23973
TCONS_00215914	hypothetical protein F775_24416
TCONS_00216090	hypothetical protein F775_28328
TCONS_00151947	hypothetical protein F775_29445
TCONS_00083844	hypothetical protein F775_29758
TCONS_00078729	hypothetical protein F775_30882
TCONS_00124732	hypothetical protein F775_43333
TCONS_00065775	hypothetical protein F775_43422
TCONS_00015750	hypothetical protein OsI_38331
TCONS_00222460	hypothetical protein TRIUR3_01690
TCONS_00130180	hypothetical protein TRIUR3_01927
TCONS_00143272	hypothetical protein TRIUR3_01927
TCONS_00072250	hypothetical protein TRIUR3_03609
TCONS_00227684	hypothetical protein TRIUR3_07134
TCONS_00017917	hypothetical protein TRIUR3_11313
TCONS_00079021	hypothetical protein TRIUR3_11313
TCONS_00088927	hypothetical protein TRIUR3_11313
TCONS_00230957	hypothetical protein TRIUR3_11313
TCONS_00134639	hypothetical protein TRIUR3_12375
TCONS_00230688	hypothetical protein TRIUR3_12863
TCONS_00073758	hypothetical protein TRIUR3_14382
TCONS_00211135	hypothetical protein TRIUR3_15141
TCONS_00079683	hypothetical protein TRIUR3_15432
TCONS_00188929	hypothetical protein TRIUR3_17331
TCONS_00034785	hypothetical protein TRIUR3_20292
TCONS_00203114	hypothetical protein TRIUR3_20380
TCONS_00005805	hypothetical protein TRIUR3_20468
TCONS_00176254	hypothetical protein TRIUR3_22544
TCONS_00195127	hypothetical protein TRIUR3_24953
TCONS_00096286	hypothetical protein TRIUR3_26271
TCONS_00013294	hypothetical protein TRIUR3_27187
TCONS_00193431	hypothetical protein TRIUR3_28068
TCONS_00052346	hypothetical protein, partial [Triticum monococcum subsp. aegilopoides]
TCONS_00230666	hypothetical protein, partial [Triticum monococcum subsp. aegilopoides]
TCONS_00133732	indole-3-acetate beta-glucosyltransferase [Zea mays]
TCONS_00054930	isoaspartyl peptidase L-asparaginase 2
TCONS_00118818	isoform 1 [Theobroma cacao]
TCONS_00227139	kDa heat-shock
TCONS_00188933	Lectin-domain containing receptor kinase
TCONS_00204195	Lectin-domain containing receptor kinase
TCONS_00058067	lipid-transfer DIR1
TCONS_00211136	Lipoxygenase 1
TCONS_00081510	LRR receptor-like serine threonine- kinase
TCONS_00089017	LRR receptor-like serine threonine- kinase
TCONS_00018247	maize ase inhibitor [Zea mays parviglumis]
TCONS_00010504	Mismatch repair endonuclease PMS2
TCONS_00019683	Mismatch repair endonuclease PMS2
TCONS_00115218	Mitochondrial metalloendopeptidase OMA1
TCONS_00011714	---NA---
TCONS_00016247	---NA---
TCONS_00016847	---NA---
TCONS_00018000	---NA---
TCONS_00019667	---NA---
TCONS_00019668	---NA---
TCONS_00025894	---NA---
TCONS_00027243	---NA---
TCONS_00027901	---NA---
TCONS_00032512	---NA---
TCONS_00035660	---NA---
TCONS_00035707	---NA---
TCONS_00039273	---NA---
TCONS_00040438	---NA---
TCONS_00043739	---NA---
TCONS_00043740	---NA---
TCONS_00049567	---NA---
TCONS_00051020	---NA---
TCONS_00054504	---NA---
TCONS_00054505	---NA---
TCONS_00058284	---NA---
TCONS_00060231	---NA---
TCONS_00079022	---NA---
TCONS_00079023	---NA---
TCONS_00079217	---NA---
TCONS_00079432	---NA---
TCONS_00079434	---NA---
TCONS_00083099	---NA---
TCONS_00083350	---NA---
TCONS_00083932	---NA---
TCONS_00088959	---NA---
TCONS_00091015	---NA---
TCONS_00093283	---NA---
TCONS_00095839	---NA---
TCONS_00097252	---NA---
TCONS_00106383	---NA---
TCONS_00110272	---NA---
TCONS_00112350	---NA---
TCONS_00116414	---NA---
TCONS_00118545	---NA---
TCONS_00121794	---NA---
TCONS_00122233	---NA---
TCONS_00123208	---NA---
TCONS_00128066	---NA---
TCONS_00131424	---NA---
TCONS_00136119	---NA---
TCONS_00139547	---NA---
TCONS_00144145	---NA---
TCONS_00150733	---NA---
TCONS_00158704	---NA---
TCONS_00159214	---NA---
TCONS_00162151	---NA---
TCONS_00162152	---NA---
TCONS_00165383	---NA---
TCONS_00165505	---NA---
TCONS_00168833	---NA---
TCONS_00169556	---NA---
TCONS_00184176	---NA---
TCONS_00184959	---NA---
TCONS_00187540	---NA---
TCONS_00189781	---NA---
TCONS_00193964	---NA---
TCONS_00194654	---NA---
TCONS_00196834	---NA---
TCONS_00197330	---NA---
TCONS_00197337	---NA---
TCONS_00200263	---NA---
TCONS_00205732	---NA---
TCONS_00207493	---NA---
TCONS_00208792	---NA---
TCONS_00211134	---NA---
TCONS_00213656	---NA---
TCONS_00215893	---NA---
TCONS_00215963	---NA---
TCONS_00215984	---NA---
TCONS_00222249	---NA---
TCONS_00226111	---NA---
TCONS_00226112	---NA---
TCONS_00226237	---NA---
TCONS_00227291	---NA---
TCONS_00229818	---NA---
TCONS_00230374	---NA---
TCONS_00078014	nicotianamine synthase 2
TCONS_00108038	Omega-3 fatty acid chloroplastic
TCONS_00099920	Os01g0370200 [Oryza sativa Japonica Group]
TCONS_00019424	Os01g0509900 [Oryza sativa Japonica Group]
TCONS_00083525	Os01g0609200 [Oryza sativa Japonica Group]
TCONS_00131166	Os01g0902700 [Oryza sativa Japonica Group]
TCONS_00210056	Os01g0930300 [Oryza sativa Japonica Group]
TCONS_00069243	Os01g0953600 [Oryza sativa Japonica Group]
TCONS_00228836	Os02g0120100 [Oryza sativa Japonica Group]
TCONS_00029801	Os02g0690200 [Oryza sativa Japonica Group]
TCONS_00164742	Os02g0733900 [Oryza sativa Japonica Group]
TCONS_00172470	Os03g0325300 [Oryza sativa Japonica Group]
TCONS_00068092	Os03g0436400 [Oryza sativa Japonica Group]
TCONS_00036648	Os04g0188400 [Oryza sativa Japonica Group]
TCONS_00031493	Os04g0406600 [Oryza sativa Japonica Group]
TCONS_00201225	Os04g0466000 [Oryza sativa Japonica Group]
TCONS_00214533	Os04g0466000 [Oryza sativa Japonica Group]
TCONS_00054543	Os04g0660000 [Oryza sativa Japonica Group]
TCONS_00016692	Os05g0186300 [Oryza sativa Japonica Group]
TCONS_00025885	Os05g0465000 [Oryza sativa Japonica Group]
TCONS_00005274	Os05g0561300 [Oryza sativa Japonica Group]
TCONS_00009021	Os05g0561300 [Oryza sativa Japonica Group]
TCONS_00009024	Os05g0561300 [Oryza sativa Japonica Group]
TCONS_00025724	Os05g0561300 [Oryza sativa Japonica Group]
TCONS_00011168	Os06g0133400 [Oryza sativa Japonica Group]
TCONS_00022346	Os06g0684500 [Oryza sativa Japonica Group]
TCONS_00106509	Os07g0271500 [Oryza sativa Japonica Group]
TCONS_00040545	Os07g0638100 [Oryza sativa Japonica Group]
TCONS_00128342	Os08g0171700 [Oryza sativa Japonica Group]
TCONS_00148174	Os08g0246300 [Oryza sativa Japonica Group]
TCONS_00167175	Os08g0389500 [Oryza sativa Japonica Group]
TCONS_00194632	Os08g0389500 [Oryza sativa Japonica Group]
TCONS_00072436	Os08g0404500 [Oryza sativa Japonica Group]
TCONS_00172939	Os08g0411300 [Oryza sativa Japonica Group]
TCONS_00222870	Os08g0485400 [Oryza sativa Japonica Group]
TCONS_00131723	Os09g0332700 [Oryza sativa Japonica Group]
TCONS_00145086	Os09g0332700 [Oryza sativa Japonica Group]
TCONS_00154531	Os09g0364400 [Oryza sativa Japonica Group]
TCONS_00130427	Os09g0441400 [Oryza sativa Japonica Group]
TCONS_00157210	Os09g0542900 [Oryza sativa Japonica Group]
TCONS_00009360	Os10g0459550 [Oryza sativa Japonica Group]
TCONS_00074897	Os10g0459550 [Oryza sativa Japonica Group]
TCONS_00088884	Os10g0459550 [Oryza sativa Japonica Group]
TCONS_00088919	Os10g0459550 [Oryza sativa Japonica Group]
TCONS_00105863	Os10g0459550 [Oryza sativa Japonica Group]
TCONS_00131164	Os10g0459550 [Oryza sativa Japonica Group]
TCONS_00229927	Os10g0459550 [Oryza sativa Japonica Group]
TCONS_00230110	Os10g0459550 [Oryza sativa Japonica Group]
TCONS_00230592	Os10g0459550 [Oryza sativa Japonica Group]
TCONS_00101416	Os10g0530600 [Oryza sativa Japonica Group]
TCONS_00134174	Os11g0134900 [Oryza sativa Japonica Group]
TCONS_00075989	partial [Oryza sativa Japonica Group]
TCONS_00095900	partial [Oryza sativa Japonica Group]
TCONS_00126646	partial [Oryza sativa Japonica Group]
TCONS_00167174	partial [Oryza sativa Japonica Group]
TCONS_00167180	partial [Oryza sativa Japonica Group]
TCONS_00169481	partial [Oryza sativa Japonica Group]
TCONS_00173356	partial [Oryza sativa Japonica Group]
TCONS_00177169	partial [Oryza sativa Japonica Group]
TCONS_00194631	partial [Oryza sativa Japonica Group]
TCONS_00195597	partial [Oryza sativa Japonica Group]
TCONS_00203106	partial [Oryza sativa Japonica Group]
TCONS_00210093	partial [Oryza sativa Japonica Group]
TCONS_00131727	PDR-type ABC transporter-like [Oryza sativa Japonica Group]
TCONS_00131728	PDR-type ABC transporter-like [Oryza sativa Japonica Group]
TCONS_00159449	Phytosulfokine receptor 2
TCONS_00095438	Pleiotropic drug resistance 4
TCONS_00131725	Pleiotropic drug resistance 4
TCONS_00145084	Pleiotropic drug resistance 4
TCONS_00159434	Pleiotropic drug resistance 4
TCONS_00060805	predicted protein
TCONS_00126726	predicted protein
TCONS_00184216	predicted protein
TCONS_00209445	predicted protein
TCONS_00216094	predicted protein
TCONS_00083276	predicted protein, partial
TCONS_00095910	PREDICTED: uncharacterized protein LOC100838841 [Brachypodium distachyon]
TCONS_00061042	probable cinnamyl alcohol dehydrogenase 6
TCONS_00225439	probable glutathione S-transferase GSTU6 [Brachypodium distachyon]
TCONS_00100425	probable glutathione S-transferase GSTU6-like
TCONS_00031942	putative 38.1 kDa protein
TCONS_00220485	retrotransposon Ty1-copia expressed [Oryza sativa Japonica Group]
TCONS_00016682	retrotransposon Ty1-copia subclass
TCONS_00040111	retrotransposon Ty1-copia subclass
TCONS_00070326	retrotransposon Ty1-copia subclass
TCONS_00205731	retrotransposon Ty1-copia subclass [Oryza sativa Japonica Group]
TCONS_00017918	retrotransposon unclassified
TCONS_00130983	retrotransposon unclassified
TCONS_00167178	retrotransposon unclassified
TCONS_00183504	retrotransposon unclassified
TCONS_00079024	retrotransposon unclassified [Oryza sativa Japonica Group]
TCONS_00036559	ribonuclease H
TCONS_00187294	ribonuclease H At1g65750
TCONS_00172853	ripening-related 6 [Setaria italica]
TCONS_00063916	Secologanin synthase
TCONS_00045559	Soluble starch synthase 2- chloroplastic amyloplastic
TCONS_00111222	Sulfotransferase 17
TCONS_00143279	transcription factor bHLH36
TCONS_00042738	U-box domain-containing 26-like
TCONS_00041746	unnamed protein product
TCONS_00066095	unnamed protein product
TCONS_00162883	WRKY transcription factor 69
TCONS_00189441	xyloglucan endotransglucosylase hydrolase 23
TCONS_00106381	zinc finger MYM-type 1-like
