# Supplementary material for: Transcriptome response of roots to salt stress in a salinity-tolerant bread wheat cultivar
Source: PLoS One. 2019 Mar 15;14(3):e0213305. doi: 10.1371/journal.pone.0213305 (PMC6420002; doi:10.1371/journal.pone.0213305)
Supplement: S13 Table — (XLSX) [file pone.0213305.s022.xlsx]

## Sheet: STR specific transcripts
RNA-Seq analysis of Bread Wheat Root Transcriptome in Response to Salt Stress Functional and Integrative Genomics N. Amirbakhtiar1, A. Ismaili1*, M.R. Ghaffari2, F. Nazarian Firouzabadi1, Z.S. Shobbar2* 1- Department of Agronomy and Plant Breeding, Faculty of Agriculture, Lorestan University, PO Box 465, Khorramabad, Iran. 2- Department of Systems Biology, Agricultural Biotechnology Research Inst…
List of transcripts exclusively expressed under salt stress:
test_id	description	GO Names	gene	locus		value_1	value_2	log2(fold_change)	test_stat	p_value	q_value	significant
TCONS_00000798	EID1-like F-box 3	P:response to abscisic acid; P:response to osmotic stress; P:single-organism process; P:regulation of biological process	TRIAE_CS42_1AL_TGACv1_000246_AA0007200	TGACv1_scaffold_000246_1AL:8985-10540		0	1.16377	inf	#NAME?	5e-05	0.00121193	yes
TCONS_00001172	hypothetical protein T12_9261, partial	F:nucleotide binding	-	TGACv1_scaffold_000387_1AL:21119-22048		0	0.658974	inf	#NAME?	5e-05	0.00121193	yes
TCONS_00003789	---NA---		-	TGACv1_scaffold_001703_1AL:44667-45129		0	1.35456	inf	#NAME?	5e-05	0.00121193	yes
TCONS_00004267	Os05g0542500 [Oryza sativa Japonica Group](LEA19)		TRIAE_CS42_1AL_TGACv1_002036_AA0038010	TGACv1_scaffold_002036_1AL:3378-4635		0	0.5012	inf	#NAME?	5e-05	0.00121193	yes
TCONS_00006417	Os07g0422100 [Oryza sativa Japonica Group]	C:integral component of membrane	TRIAE_CS42_1AS_TGACv1_019041_AA0058660	TGACv1_scaffold_019041_1AS:26777-28845		0	0.530839	inf	#NAME?	0.0001	0.00226435	yes
TCONS_00010418	---NA---		-	TGACv1_scaffold_030611_1BL:171706-173000		0	2.06956	inf	#NAME?	5e-05	0.00121193	yes
TCONS_00010583	Aldose reductase	P:photoperiodism, flowering; C:cytoplasm; F:alditol:NADP+ 1-oxidoreductase activity; P:oxidation-reduction process; P:vernalization response	TRIAE_CS42_1BL_TGACv1_030669_AA0097430	TGACv1_scaffold_030669_1BL:49135-51590		0	1.13628	inf	#NAME?	5e-05	0.00121193	yes
TCONS_00012372	Os03g0117900 [Oryza sativa Japonica Group](AP2 domain containing protein, expressed(TF))	C:nucleus; F:DNA binding; F:transcription factor activity, sequence-specific DNA binding; P:transcription, DNA-templated; C:mitochondrion; P:regulation of transcription, DNA-templated	TRIAE_CS42_1BL_TGACv1_031419_AA0113650	TGACv1_scaffold_031419_1BL:61745-62845		0	0.621866	inf	#NAME?	5e-05	0.00121193	yes
TCONS_00012953	---NA---		-	TGACv1_scaffold_031688_1BL:9891-11035		0	12.5997	inf	#NAME?	5e-05	0.00121193	yes
TCONS_00016471	histone H4 [Zea mays]	C:nuclear nucleosome; C:Golgi apparatus; P:DNA-templated transcription, initiation; C:nucleolus; C:vacuolar membrane; C:plasma membrane; P:nucleosome assembly; C:thylakoid; P:response to water deprivation; F:DNA binding; C:chloroplast; C:plasmodesma; F:histone binding; F:protein heterodimerization activity; C:cytosol	TRIAE_CS42_1BS_TGACv1_049375_AA0151120	TGACv1_scaffold_049375_1BS:101459-102115		0	1.0884	inf	#NAME?	5e-05	0.00121193	yes
TCONS_00016573	---NA---		-	TGACv1_scaffold_049395_1BS:246333-247384		0	0.847674	inf	#NAME?	5e-05	0.00121193	yes
TCONS_00017265	PM19-D3 [Triticum aestivum]	C:integral component of membrane	TRIAE_CS42_1BS_TGACv1_049649_AA0158860	TGACv1_scaffold_049649_1BS:137645-145725		0	1.15818	inf	#NAME?	5e-05	0.00121193	yes
TCONS_00017266	PM19-D3 [Triticum aestivum]	C:integral component of membrane	TRIAE_CS42_1BS_TGACv1_049649_AA0158860	TGACv1_scaffold_049649_1BS:137645-145725		0	0.475323	inf	#NAME?	0.06825	0.381337	no
TCONS_00017502	Os03g0381500 [Oryza sativa Japonica Group]	C:integral component of membrane	TRIAE_CS42_1BS_TGACv1_049754_AA0160890	TGACv1_scaffold_049754_1BS:107892-108955		0	3.7165	inf	#NAME?	5e-05	0.00121193	yes
TCONS_00018549	---NA---		-	TGACv1_scaffold_050294_1BS:33994-36275		0	0.643835	inf	#NAME?	5e-05	0.00121193	yes
TCONS_00018670	transposon En Spm sub-class		-	TGACv1_scaffold_050384_1BS:1866-4030		0	0.457285	inf	#NAME?	5e-05	0.00121193	yes
TCONS_00018872	Os02g0324300 [Oryza sativa Japonica Group]		-	TGACv1_scaffold_050588_1BS:26959-30493		0	0.420622	inf	#NAME?	5e-05	0.00121193	yes
TCONS_00019298	---NA---		TRIAE_CS42_1BS_TGACv1_051074_AA0177620	TGACv1_scaffold_051074_1BS:29894-31775		0	1.22282	inf	#NAME?	5e-05	0.00121193	yes
TCONS_00022193	non-specific lipid-transfer AKCS9		TRIAE_CS42_1DL_TGACv1_061859_AA0204510	TGACv1_scaffold_061859_1DL:68317-69005		0	0.566909	inf	#NAME?	0.00015	0.00322599	yes
TCONS_00024883	Aldose reductase	P:photoperiodism, flowering; C:cytoplasm; F:alditol:NADP+ 1-oxidoreductase activity; P:oxidation-reduction process; P:vernalization response	TRIAE_CS42_1DL_TGACv1_063445_AA0227330	TGACv1_scaffold_063445_1DL:10126-12995		0	2.86653	inf	#NAME?	5e-05	0.00121193	yes
TCONS_00026699	Os03g0381500 [Oryza sativa Japonica Group]	C:integral component of membrane	TRIAE_CS42_1DS_TGACv1_080264_AA0244730	TGACv1_scaffold_080264_1DS:84881-85815		0	1.287	inf	#NAME?	5e-05	0.00121193	yes
TCONS_00027315	---NA---		-	TGACv1_scaffold_080583_1DS:18067-18908		0	0.62016	inf	#NAME?	5e-05	0.00121193	yes
TCONS_00032459	---NA---		-	TGACv1_scaffold_094423_2AL:59217-59669		0	1.47643	inf	#NAME?	0.00015	0.00322599	yes
TCONS_00032537	---NA---		-	TGACv1_scaffold_094465_2AL:32135-32849		0	0.951756	inf	#NAME?	5e-05	0.00121193	yes
TCONS_00032765	---NA---		-	TGACv1_scaffold_094581_2AL:17290-18461		0	6.26488	inf	#NAME?	5e-05	0.00121193	yes
TCONS_00049216	Os07g0638300 [Oryza sativa Japonica Group]	F:peroxidase activity; C:nucleus; P:maintenance of seed dormancy; P:cellular oxidant detoxification; P:response to desiccation; P:oxidation-reduction process; F:peroxiredoxin activity	PER1	TGACv1_scaffold_145997_2BS:2566-3705		0	0.526987	inf	#NAME?	5e-05	0.00121193	yes
TCONS_00057296	WAMP- antimicrobial peptide	F:chitinase activity; P:carbohydrate metabolic process; P:cell wall macromolecule catabolic process; F:chitin binding; P:chitin catabolic process; P:killing of cells of other organism; P:defense response to fungus; P:defense response to bacterium	TRIAE_CS42_2DL_TGACv1_159104_AA0532470	TGACv1_scaffold_159104_2DL:9986-10645		0	1.35675	inf	#NAME?	5e-05	0.00121193	yes
TCONS_00058908	Topless-related 2	P:embryo development; C:integral component of membrane	TRIAE_CS42_2DL_TGACv1_160076_AA0546420	TGACv1_scaffold_160076_2DL:34985-40271		0	0.728625	inf	#NAME?	5e-05	0.00121193	yes
TCONS_00058909	Topless-related 2	P:embryo development; C:integral component of membrane	TRIAE_CS42_2DL_TGACv1_160076_AA0546420	TGACv1_scaffold_160076_2DL:34985-40271		0	0	0	0	1	1	no
TCONS_00058910	Topless-related 2	C:integral component of membrane	TRIAE_CS42_2DL_TGACv1_160076_AA0546420	TGACv1_scaffold_160076_2DL:34985-40271		0	0.0527406	inf	0	1	1	no
TCONS_00062039	Os07g0616800 [Oryza sativa Japonica Group](Sucrose synthase 3)	P:biosynthetic process; F:sucrose synthase activity; P:sucrose metabolic process; P:response to carbon dioxide	TRIAE_CS42_2DS_TGACv1_177457_AA0577630	TGACv1_scaffold_177457_2DS:50405-56917		0	0.936979	inf	#NAME?	5e-05	0.00121193	yes
TCONS_00067008	Os12g0187800 [Oryza sativa Japonica Group]		TRIAE_CS42_3AL_TGACv1_194017_AA0624620	TGACv1_scaffold_194017_3AL:108225-111050		0	0.525314	inf	#NAME?	5e-05	0.00121193	yes
TCONS_00068891	[Hordeum vulgare vulgare]	C:plastid	TRIAE_CS42_3AL_TGACv1_194889_AA0641440	TGACv1_scaffold_194889_3AL:26496-27575		0	0.682984	inf	#NAME?	5e-05	0.00121193	yes
TCONS_00069055	Os01g0644200 [Oryza sativa Japonica Group]	C:integral component of membrane	-	TGACv1_scaffold_194966_3AL:59109-59870		0	5.65655	inf	#NAME?	5e-05	0.00121193	yes
TCONS_00072654	expansin-A24-like [Brachypodium distachyon]	C:cell wall; C:membrane; P:plant-type cell wall organization; C:extracellular region	TRIAE_CS42_3AS_TGACv1_210583_AA0675410	TGACv1_scaffold_210583_3AS:74005-75165		0	0.461139	inf	#NAME?	5e-05	0.00121193	yes
TCONS_00079270	NADP-dependent malic enzyme	P:malate metabolic process; F:metal ion binding; F:NAD binding; F:malate dehydrogenase (decarboxylating) (NAD+) activity; P:oxidation-reduction process	TRIAE_CS42_3B_TGACv1_221341_AA0737900	TGACv1_scaffold_221341_3B:38946-41645		0	1.77808	inf	#NAME?	5e-05	0.00121193	yes
TCONS_00079474	---NA---		-	TGACv1_scaffold_221410_3B:123118-125544		0	0.770085	inf	#NAME?	5e-05	0.00121193	yes
TCONS_00079762	Os01g0961000 [Oryza sativa Japonica Group]		TRIAE_CS42_3B_TGACv1_221515_AA0742530	TGACv1_scaffold_221515_3B:25180-30395		0	0.616745	inf	#NAME?	5e-05	0.00121193	yes
TCONS_00083664	Os01g0226400 [Oryza sativa Japonica Group]	C:nucleus; F:ATP binding; C:integral component of membrane; P:cytoplasmic microtubule organization; F:microtubule-severing ATPase activity	-	TGACv1_scaffold_223314_3B:8284-9327		0	0.535633	inf	#NAME?	5e-05	0.00121193	yes
TCONS_00087134	Os12g0187800 [Oryza sativa Japonica Group]		TRIAE_CS42_3B_TGACv1_225813_AA0812090	TGACv1_scaffold_225813_3B:14363-16755		0	0.448598	inf	#NAME?	5e-05	0.00121193	yes
TCONS_00088877	hypothetical protein F775_21782		TRIAE_CS42_3B_TGACv1_234503_AA0832020	TGACv1_scaffold_234503_3B:906-1735		0	0.553754	inf	#NAME?	5e-05	0.00121193	yes
TCONS_00089351	Os12g0187800 [Oryza sativa Japonica Group]		TRIAE_CS42_3DL_TGACv1_249118_AA0838350	TGACv1_scaffold_249118_3DL:173673-176025		0	0.437261	inf	#NAME?	0.00015	0.00322599	yes
TCONS_00089959	Os01g0654400 [Oryza sativa Japonica Group]	C:plastid	TRIAE_CS42_3DL_TGACv1_249279_AA0843990	TGACv1_scaffold_249279_3DL:68578-69155		0	1.79627	inf	#NAME?	5e-05	0.00121193	yes
TCONS_00091345	EID1-like F-box 3	C:nucleus; P:abscisic acid-activated signaling pathway; P:response to salt stress; P:vegetative to reproductive phase transition of meristem; P:regulation of seed germination; P:response to water deprivation	TRIAE_CS42_3DL_TGACv1_249811_AA0856750	TGACv1_scaffold_249811_3DL:17765-19070		0	0.754128	inf	#NAME?	5e-05	0.00121193	yes
TCONS_00095885	Os01g0565600 [Oryza sativa Japonica Group]		-	TGACv1_scaffold_259346_3DL:2292-2728		0	4.66468	inf	#NAME?	5e-05	0.00121193	yes
TCONS_00099041	Os01g0276300 [Oryza sativa Japonica Group]		TRIAE_CS42_3DS_TGACv1_272930_AA0926770	TGACv1_scaffold_272930_3DS:22064-23775		0	1.30231	inf	#NAME?	5e-05	0.00121193	yes
TCONS_00099042	Os01g0276300 [Oryza sativa Japonica Group]	P:embryo development ending in seed dormancy; C:cytosol	TRIAE_CS42_3DS_TGACv1_272930_AA0926770	TGACv1_scaffold_272930_3DS:22064-23775		0	0.0700286	inf	0	1	1	no
TCONS_00099043	Os01g0276300 [Oryza sativa Japonica Group]	P:embryo development ending in seed dormancy; C:cytosol	TRIAE_CS42_3DS_TGACv1_272930_AA0926770	TGACv1_scaffold_272930_3DS:22064-23775		0	0.0809842	inf	0	1	1	no
TCONS_00101632	hypothetical protein TRIUR3_33447		-	TGACv1_scaffold_288610_4AL:60105-60522		0	1.71891	inf	#NAME?	0.0001	0.00226435	yes
TCONS_00102691	Patatin group A-3	F:serine-type endopeptidase inhibitor activity; F:acylglycerol lipase activity; C:membrane; P:lipid catabolic process; P:negative regulation of endopeptidase activity; C:extracellular region; C:plastid; F:phospholipase activity	TRIAE_CS42_4AL_TGACv1_289022_AA0963630	TGACv1_scaffold_289022_4AL:17860-21375		0	0.414328	inf	0	1	1	no
TCONS_00102692	Patatin group A-3	F:serine-type endopeptidase inhibitor activity; F:acylglycerol lipase activity; C:membrane; P:lipid catabolic process; P:negative regulation of endopeptidase activity; C:extracellular region; C:plastid; F:phospholipase activity	TRIAE_CS42_4AL_TGACv1_289022_AA0963630	TGACv1_scaffold_289022_4AL:17860-21375		0	1.66674	inf	#NAME?	5e-05	0.00121193	yes
TCONS_00108783	seed maturation PM41 [Zea mays]		TRIAE_CS42_4AS_TGACv1_307343_AA1019690	TGACv1_scaffold_307343_4AS:53105-53740		0	0.774646	inf	#NAME?	0.0001	0.00226435	yes
TCONS_00108916	Os03g0305600 [Oryza sativa Japonica Group]	C:mitochondrial inner membrane presequence translocase complex; C:integral component of mitochondrial inner membrane; F:protein channel activity; P:protein import into mitochondrial matrix	TRIAE_CS42_4AS_TGACv1_307478_AA1020610	TGACv1_scaffold_307478_4AS:52567-53945		0	4.52646	inf	#NAME?	5e-05	0.00121193	yes
TCONS_00109969	retrotransposon Ty1-copia subclass	F:nucleic acid binding; C:intracellular membrane-bounded organelle; C:cytoplasmic part; P:DNA metabolic process	-	TGACv1_scaffold_308641_4AS:1262-1792		0	1.90763	inf	#NAME?	5e-05	0.00121193	yes
TCONS_00111421	Os03g0232400 [Oryza sativa Japonica Group]	P:cell proliferation; F:growth factor activity; C:extracellular region	TRIAE_CS42_4BL_TGACv1_320533_AA1042400	TGACv1_scaffold_320533_4BL:43070-43875		0	0.995774	inf	#NAME?	5e-05	0.00121193	yes
TCONS_00119935	seed maturation PM41 [Zea mays]		TRIAE_CS42_4DL_TGACv1_342480_AA1114740	TGACv1_scaffold_342480_4DL:132155-132780		0	3.64529	inf	#NAME?	5e-05	0.00121193	yes
TCONS_00119939	Os03g0277500 [Oryza sativa Japonica Group]	F:lyase activity; P:response to osmotic stress; C:extracellular region; P:response to water deprivation	TRIAE_CS42_4DL_TGACv1_342480_AA1114730	TGACv1_scaffold_342480_4DL:131328-132025		0	11.1051	inf	#NAME?	5e-05	0.00121193	yes
TCONS_00125109	---NA---		-	TGACv1_scaffold_361089_4DS:160511-161090		0	0.919658	inf	#NAME?	5e-05	0.00121193	yes
TCONS_00126498	EPIDERMAL PATTERNING FACTOR 2	P:guard cell differentiation	TRIAE_CS42_4DS_TGACv1_361704_AA1171780	TGACv1_scaffold_361704_4DS:33245-34083		0	0.42198	inf	#NAME?	0.0008	0.0135597	yes
TCONS_00128423	---NA---		-	TGACv1_scaffold_374010_5AL:154364-155606		0	0.784811	inf	#NAME?	5e-05	0.00121193	yes
TCONS_00131425	---NA---		-	TGACv1_scaffold_375076_5AL:66000-71678		0	417707	inf	#NAME?	5e-05	0.00121193	yes
TCONS_00138646	Obtusifoliol 14-alpha demethylase	F:GTP binding; F:iron ion binding; C:integral component of membrane; C:endoplasmic reticulum; F:methyltransferase activity; P:oxidation-reduction process; F:sterol 14-demethylase activity; P:demethylation; C:plasma membrane; P:sterol biosynthetic process; F:heme binding; P:methylation	-	TGACv1_scaffold_394495_5AS:10268-12853		0	0.49387	inf	#NAME?	5e-05	0.00121193	yes
TCONS_00141835	Os09g0127700 [Oryza sativa Japonica Group]	C:integral component of membrane	TRIAE_CS42_5BL_TGACv1_404792_AA1310900	TGACv1_scaffold_404792_5BL:62927-64345		0	0.601785	inf	#NAME?	5e-05	0.00121193	yes
TCONS_00143923	---NA---		-	TGACv1_scaffold_405540_5BL:61418-62019		0	0.655151	inf	#NAME?	0.0005	0.00915668	yes
TCONS_00146234	---NA---		-	TGACv1_scaffold_406801_5BL:52663-54092		0	3.21482	inf	#NAME?	5e-05	0.00121193	yes
TCONS_00148093	---NA---		-	TGACv1_scaffold_411398_5BL:3903-4375		0	2.67574	inf	#NAME?	5e-05	0.00121193	yes
TCONS_00149278	---NA---		TRIAE_CS42_5BS_TGACv1_423521_AA1378640	TGACv1_scaffold_423521_5BS:44085-45360		0	0.516716	inf	#NAME?	0.0008	0.0135597	yes
TCONS_00151523	[Oryza sativa Japonica Group]		TRIAE_CS42_5DL_TGACv1_433016_AA1398260	TGACv1_scaffold_433016_5DL:166435-167225		0	1.1926	inf	#NAME?	5e-05	0.00121193	yes
TCONS_00153815	partial [Oryza sativa Japonica Group](LEA protein 12)	F:ATP binding; C:cytosol; F:unfolded protein binding; P:protein folding; P:response to stress	TRIAE_CS42_5DL_TGACv1_433655_AA1418480	TGACv1_scaffold_433655_5DL:49036-49935		0	0.814924	inf	#NAME?	5e-05	0.00121193	yes
TCONS_00156528	PM19-D3 [Triticum aestivum]	C:integral component of membrane	TRIAE_CS42_5DL_TGACv1_434869_AA1442840	TGACv1_scaffold_434869_5DL:25935-27039		0	0.779341	inf	#NAME?	5e-05	0.00121193	yes
TCONS_00159600	hypothetical protein F775_13848	C:mitochondrion; F:double-stranded DNA binding; P:regulation of transcription, DNA-templated	TRIAE_CS42_5DS_TGACv1_456510_AA1472610	TGACv1_scaffold_456510_5DS:87795-90460		0	0	0	0	1	1	no
TCONS_00159601	hypothetical protein F775_13848	C:mitochondrion; F:double-stranded DNA binding; P:regulation of transcription, DNA-templated	TRIAE_CS42_5DS_TGACv1_456510_AA1472610	TGACv1_scaffold_456510_5DS:87795-90460		0	2.04405	inf	#NAME?	5e-05	0.00121193	yes
TCONS_00159963	Glutaredoxin-C1	F:protein disulfide oxidoreductase activity; C:cytoplasm; F:electron carrier activity; C:integral component of membrane; P:cell redox homeostasis; P:oxidation-reduction process	TRIAE_CS42_5DS_TGACv1_456659_AA1475720	TGACv1_scaffold_456659_5DS:119415-120130		0	0.570794	inf	#NAME?	5e-05	0.00121193	yes
TCONS_00165518	---NA---		TRIAE_CS42_6AL_TGACv1_472707_AA1525130	TGACv1_scaffold_472707_6AL:32585-37167		0	0.897051	inf	#NAME?	0.0094	0.0978169	no
TCONS_00165519	---NA---		TRIAE_CS42_6AL_TGACv1_472707_AA1525130	TGACv1_scaffold_472707_6AL:32585-37167		0	0.640803	inf	#NAME?	0.06725	0.378017	no
TCONS_00169801	[Hordeum vulgare vulgare]	C:mitochondrion	TRIAE_CS42_6AS_TGACv1_487142_AA1568510	TGACv1_scaffold_487142_6AS:12515-13741		0	9.2507	inf	#NAME?	5e-05	0.00121193	yes
TCONS_00170324	basic helix-loop-helix family [Populus trichocarpa](tf)	C:nucleus; F:DNA binding; F:protein dimerization activity	TRIAE_CS42_6AS_TGACv1_487945_AA1573750	TGACv1_scaffold_487945_6AS:24835-25596		0	2.47679	inf	#NAME?	5e-05	0.00121193	yes
TCONS_00171323	vacuolar iron transporter homolog 1-like [Brassica napus]	F:iron ion transmembrane transporter activity; P:manganese ion transmembrane transport; C:integral component of membrane; P:cellular response to ethylene stimulus; P:cellular response to nitric oxide; F:manganese ion transmembrane transporter activity; P:intracellular sequestering of iron ion; C:vacuolar membrane; P:cellular manganese ion homeostasis; P:cellular response to iron ion; P:iron ion t…	TRIAE_CS42_6BL_TGACv1_499508_AA1584620	TGACv1_scaffold_499508_6BL:141032-142025		0	0.842859	inf	#NAME?	5e-05	0.00121193	yes
TCONS_00172859	TRANSPARENT TESTA 12	P:reciprocal meiotic recombination; P:sugar mediated signaling pathway; P:exocytosis; P:negative regulation of flower development; P:meiotic DNA double-strand break formation; C:microtubule; P:actin filament-based process; P:unidimensional cell growth; P:positive regulation of transcription, DNA-templated; P:histone phosphorylation; P:response to gamma radiation; P:histone H3-K9 methylation; P:re…	-	TGACv1_scaffold_500099_6BL:43339-43700		0	3.07737	inf	#NAME?	0.0002	0.00415518	yes
TCONS_00173582	zinc finger MYM-type 1-like	F:DNA binding; C:cytoplasm; C:nucleoplasm; F:RNA polymerase II transcription factor activity, sequence-specific DNA binding	-	TGACv1_scaffold_500521_6BL:39306-40127		0	0.756497	inf	#NAME?	5e-05	0.00121193	yes
TCONS_00176589	---NA---		-	TGACv1_scaffold_513191_6BS:29928-30702		0	3.35049	inf	#NAME?	5e-05	0.00121193	yes
TCONS_00176870	[Hordeum vulgare vulgare]	F:ATP binding; F:protein serine/threonine kinase activity; F:rRNA N-glycosylase activity; P:protein phosphorylation; P:defense response; P:negative regulation of translation	TRIAE_CS42_6BS_TGACv1_513263_AA1636470	TGACv1_scaffold_513263_6BS:2135-4280		0	13.8447	inf	#NAME?	5e-05	0.00121193	yes
TCONS_00178504	---NA---		-	TGACv1_scaffold_513982_6BS:77331-78161		0	0.746663	inf	#NAME?	0.0004	0.00759387	yes
TCONS_00183110	---NA---		TRIAE_CS42_6DL_TGACv1_527002_AA1697030	TGACv1_scaffold_527002_6DL:10355-16272		0	0.520166	inf	#NAME?	5e-05	0.00121193	yes
TCONS_00183111	---NA---		TRIAE_CS42_6DL_TGACv1_527002_AA1697030	TGACv1_scaffold_527002_6DL:10355-16272		0	0.169037	inf	0	1	1	no
TCONS_00185531	dehydrin 7 [Hordeum vulgare spontaneum]	P:response to stress; P:response to water	TRIAE_CS42_6DL_TGACv1_529405_AA1718250	TGACv1_scaffold_529405_6DL:7185-8162		0	0.788789	inf	#NAME?	5e-05	0.00121193	yes
TCONS_00186211	[Hordeum vulgare vulgare]	F:metal ion binding; C:virion	TRIAE_CS42_6DS_TGACv1_542641_AA1726210	TGACv1_scaffold_542641_6DS:36756-38167		0	3.41409	inf	#NAME?	5e-05	0.00121193	yes
TCONS_00186379	BURP domain-containing 13-like [Setaria italica]	P:pollen development	-	TGACv1_scaffold_542690_6DS:104646-104950		0	9.40261	inf	#NAME?	5e-05	0.00121193	yes
TCONS_00186380	BURP domain-containing 13-like [Setaria italica]	P:pollen development; C:exine	-	TGACv1_scaffold_542690_6DS:105037-105616		0	0.907824	inf	#NAME?	0.0001	0.00226435	yes
TCONS_00188533	[Hordeum vulgare vulgare]	C:mitochondrion	TRIAE_CS42_6DS_TGACv1_544329_AA1747800	TGACv1_scaffold_544329_6DS:22830-23775		0	14.6233	inf	#NAME?	5e-05	0.00121193	yes
TCONS_00188779	Flavin-containing monooxygenase FMO GS-OX-like 9	F:NADP binding; F:flavin adenine dinucleotide binding; P:oxidation-reduction process; F:N,N-dimethylaniline monooxygenase activity	TRIAE_CS42_6DS_TGACv1_545583_AA1750420	TGACv1_scaffold_545583_6DS:4903-5310		0	2.84635	inf	#NAME?	5e-05	0.00121193	yes
TCONS_00189234	Os06g0653200 [Oryza sativa Japonica Group]	C:nucleus; F:protein dimerization activity	TRIAE_CS42_7AL_TGACv1_556102_AA1755810	TGACv1_scaffold_556102_7AL:9358-10375		0	1.18608	inf	#NAME?	5e-05	0.00121193	yes
TCONS_00193764	---NA---		-	TGACv1_scaffold_559403_7AL:18806-19565		0	1.1908	inf	#NAME?	5e-05	0.00121193	yes
TCONS_00193877	FAR1-RELATED SEQUENCE 10 [Brachypodium distachyon]	F:zinc ion binding; P:regulation of transcription, DNA-templated	-	TGACv1_scaffold_559749_7AL:10634-12037		0	0.693184	inf	#NAME?	5e-05	0.00121193	yes
TCONS_00194892	hypothetical protein TRIUR3_11227		-	TGACv1_scaffold_569282_7AS:105480-105987		0	1.19516	inf	#NAME?	5e-05	0.00121193	yes
TCONS_00195332	Os06g0324400 [Oryza sativa Japonica Group]	P:embryo development	TRIAE_CS42_7AS_TGACv1_569465_AA1816630	TGACv1_scaffold_569465_7AS:87642-88430		0	0.560507	inf	#NAME?	0.00015	0.00322599	yes
TCONS_00198135	Os06g0258000 [Oryza sativa Japonica Group](Myb related transcription factor)	F:DNA binding	TRIAE_CS42_7AS_TGACv1_570884_AA1842010	TGACv1_scaffold_570884_7AS:31585-32932		0	6.08815	inf	#NAME?	5e-05	0.00121193	yes
TCONS_00202891	Os09g0499400 [Oryza sativa Japonica Group]	P:metabolic process	-	TGACv1_scaffold_578131_7BL:42336-43099		0	1.19775	inf	#NAME?	0.0001	0.00226435	yes
TCONS_00203374	---NA---		-	TGACv1_scaffold_578400_7BL:2118-2972		0	1.02048	inf	#NAME?	5e-05	0.00121193	yes
TCONS_00204022	---NA---		TRIAE_CS42_7BL_TGACv1_578814_AA1900630	TGACv1_scaffold_578814_7BL:39985-40710		0	0.586456	inf	#NAME?	0.00075	0.012856	yes
TCONS_00205101	late embryogenesis abundant D-34-like	P:response to abscisic acid; P:response to osmotic stress; P:response to lithium ion; C:cytosol; C:nucleolus; P:seed germination; P:cellular ion homeostasis; P:response to water deprivation	TRIAE_CS42_7BL_TGACv1_579779_AA1909950	TGACv1_scaffold_579779_7BL:16496-17835		0	3.46678	inf	#NAME?	5e-05	0.00121193	yes
TCONS_00205410	hypothetical protein F775_13830		-	TGACv1_scaffold_580293_7BL:29168-29526		0	3.33733	inf	#NAME?	5e-05	0.00121193	yes
TCONS_00206171	---NA---		-	TGACv1_scaffold_591801_7BS:139583-140002		0	2.25968	inf	#NAME?	5e-05	0.00121193	yes
TCONS_00206235	MOTHER of FT and TF 1-like		TRIAE_CS42_7BS_TGACv1_591813_AA1922200	TGACv1_scaffold_591813_7BS:278823-282672		0	0.709436	inf	#NAME?	5e-05	0.00121193	yes
TCONS_00206236	MOTHER of FT and TF 1-like		TRIAE_CS42_7BS_TGACv1_591813_AA1922200	TGACv1_scaffold_591813_7BS:278823-282672		0	1.20009e-06	inf	0	1	1	no
TCONS_00207638	Os06g0324400 [Oryza sativa Japonica Group]	P:embryo development	TRIAE_CS42_7BS_TGACv1_592266_AA1934580	TGACv1_scaffold_592266_7BS:41885-42525		0	5.04925	inf	#NAME?	5e-05	0.00121193	yes
TCONS_00209054	Os06g0258000 [Oryza sativa Japonica Group](Myb related transcription factor)	F:DNA binding	TRIAE_CS42_7BS_TGACv1_592936_AA1946450	TGACv1_scaffold_592936_7BS:7236-8615		0	4.96397	inf	#NAME?	5e-05	0.00121193	yes
TCONS_00209055	Os06g0258000 [Oryza sativa Japonica Group](Myb related transcription factor)	F:DNA binding	TRIAE_CS42_7BS_TGACv1_592936_AA1946450	TGACv1_scaffold_592936_7BS:7236-8615		0	0.0600991	inf	0	1	1	no
TCONS_00221378	hypothetical protein TRIUR3_01503		TRIAE_CS42_U_TGACv1_640700_AA2069560	TGACv1_scaffold_640700_U:276040-276745		0	0.959819	inf	#NAME?	5e-05	0.00121193	yes
TCONS_00222284	14 kDa proline-rich -like [Gossypium raimondii]		TRIAE_CS42_U_TGACv1_640870_AA2077870	TGACv1_scaffold_640870_U:45919-47170		0	0.515904	inf	#NAME?	5e-05	0.00121193	yes
TCONS_00222341	hypothetical protein OsI_28776		-	TGACv1_scaffold_640889_U:18912-19737		0	0.535348	inf	#NAME?	5e-05	0.00121193	yes
TCONS_00223386	Os01g0705200 [Oryza sativa Japonica Group](Late embryogenesis abundant protein 14)		TRIAE_CS42_U_TGACv1_641203_AA2088310	TGACv1_scaffold_641203_U:183210-184395		0	0.670792	inf	#NAME?	5e-05	0.00121193	yes
TCONS_00225307	SNF1-related kinase regulatory subunit gamma-like PV42a	P:phosphorylation; F:kinase activity	TRIAE_CS42_U_TGACv1_641880_AA2106590	TGACv1_scaffold_641880_U:48885-50791		0	1.45951	inf	#NAME?	5e-05	0.00121193	yes
TCONS_00226647	hypothetical protein F775_30869		TRIAE_CS42_U_TGACv1_642525_AA2118990	TGACv1_scaffold_642525_U:67947-68705		0	0.696013	inf	#NAME?	5e-05	0.00121193	yes
TCONS_00226952	hypothetical protein TRIUR3_33496		TRIAE_CS42_U_TGACv1_642730_AA2122310	TGACv1_scaffold_642730_U:9205-12120		0	0.918287	inf	#NAME?	0.0001	0.00226435	yes
TCONS_00228919	MOTHER of FT and TF 1-like		TRIAE_CS42_U_TGACv1_644536_AA2140290	TGACv1_scaffold_644536_U:11765-14105		0	0.656461	inf	#NAME?	5e-05	0.00121193	yes
TCONS_00229655	Os03g0277500 [Oryza sativa Japonica Group]	F:lyase activity	TRIAE_CS42_U_TGACv1_648106_AA2148020	TGACv1_scaffold_648106_U:10395-11220		0	2.07834	inf	#NAME?	5e-05	0.00121193	yes
TCONS_00230060	PREDICTED: uncharacterized protein LOC103956333		-	TGACv1_scaffold_667923_U:1545-1958		0	2.05445	inf	#NAME?	0.0001	0.00226435	yes
TCONS_00230607	PHD finger rhinoceros	F:zinc ion binding	-	TGACv1_scaffold_697250_U:131-910		0	1.23143	inf	#NAME?	5e-05	0.00121193	yes
TCONS_00231089	hypothetical protein SORBIDRAFT_0070s002020, partial [Sorghum bicolor]		-	TGACv1_scaffold_726193_1AS:699-1067		0	3.10612	inf	#NAME?	5e-05	0.00121193	yes
